# Supplementary material for: A Multifaceted Intervention to Implement Guidelines and Improve Admission Paediatric Care in Kenyan District Hospitals: A Cluster Randomised Trial
Source: PLoS Med. 2011 Apr 5;8(4):e1001018. doi: 10.1371/journal.pmed.1001018 (PMC3071366; doi:10.1371/journal.pmed.1001018)
Supplement: Table S2 — The main diagnoses among all 8,205 study participants aged 2–59 mo by hospital during each survey. (XLS) [file pmed.1001018.s003.xls]

## Sheet: Sheet1
Table S2: The main diagnoses among all 8205 study participants aged 2 to 59 months by hospital during each survey
	H1	H2	H3	H4	H5	H6	H7	H8
Survey 1
Total number of children*	246	330	261	293	121	285	276	323
Episodes of:
Malaria	214(87.0)	219(66.4)	211(80.8)	220(75.1)	103(85.1)	185(64.9)	249(90.2)	142(44.0)
Pneumonia	97(39.4)	189(57.3)	100(38.3)	137(46.8)	18(14.9)	140(49.1)	78(28.3)	146(45.2)
Diarrhoea/ Dehydration	35(14.2)	52(15.8)	68(26.1)	43(14.7)	16(13.2)	62(21.8)	47(17.0)	100(31.0)
Survey 2
Total number of children*	241	331	247	203	108	208	279	245
Episodes of:
Malaria	185(76.8)	208(62.8)	151(61.1)	160(78.8)	82(75.9)	150(72.1)	212(76.0)	96(39.2)
Pneumonia	112(46.5)	199(60.1)	105(42.5)	100(49.3)	30(27.8)	137(65.9)	77(27.6)	134(54.7)
Diarrhoea/ Dehydration	71(29.5)	43(13.0)	54(21.9)	46(22.7)	23(21.3)	52(25.0)	44(15.8)	64(26.1)
Survey 3
Total number of children*	231	335	272	236	138	217	232	242
Episodes of:
Malaria	175(75.8)	239(71.3)	192(70.6)	176(74.6)	61(44.2)	132(60.8)	186(80.2)	114(47.1)
Pneumonia	117(50.6)	220(65.7)	153(56.3)	150(63.6)	25(18.1)	111(51.2)	123(53.0)	112(46.3)
Diarrhoea/ Dehydration	51(22.1)	54(16.1)	51(18.8)	60(25.4)	18(13.0)	54(24.9)	29(12.5)	62(25.6)
Survey 4
Total number of children*	230	312	309	307	271	198	341	337
Episodes of:
Malaria	184(80.0)	200(64.1)	196(63.4)	243(79.2)	212(78.2)	105(53.0)	273(80.1)	127(37.7)
Pneumonia	81(35.2)	211(67.6)	111(35.9)	160(52.1)	85(31.4)	111(56.1)	145(42.5)	181(53.7)
Diarrhoea/ Dehydration	60(26.1)	91(29.2)	150(48.5)	111(36.2)	28(10.3)	55(27.8)	81(23.8)	91(27.0)
Survey 5**
Total number of children*	229	327	270	195
Episodes of:
Malaria	140(61.1)	145(44.3)	73(27.0)	82(42.1)
Pneumonia	59(25.8)	116(35.5)	85(31.5)	78(40.0)
Diarrhoea/ Dehydration	75(32.8)	45(13.8)	91(33.7)	37(19.0)
Survey 6**
Total number of children*	195	311	297	303
Episodes of:
Malaria	138(70.8)	104(33.4)	96(32.3)	149(49.2)
Pneumonia	38(19.5)	114(36.7)	82(27.6)	88(29.0)
Diarrhoea/ Dehydration	38(19.5)	39(12.5)	139(46.8)	86(28.4)
* represents the denominator for the respective survey
**survey conducted in the intervention group only
